# Supplementary material
Source: PubMed Central journal article supplement (PMC3567700)
Supplement: Supp_Fig1.pdf [file Supp_Fig1.pdf]

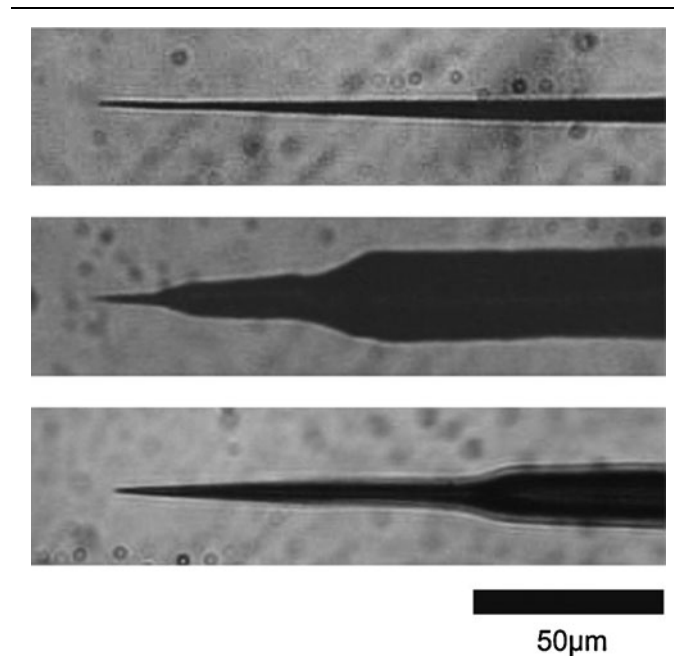

**Supplementary Fig. S1.** Microscopic images of etched silver bond-wire tips. The silver wire was dipped into the etching solution (20% perchloric acid–methanol) under microscopic control and the etching process was continued until a suitable tip form was obtained. Tapering and tip size was controlled by varying the velocity and duration of the dipping process. Note, that sharp tip and slender taper are obligate for successful impalement of cells by the DAImm technique. DAImm, dielectrophoretically-accessed intracellular membrane–potential measurement.
