# Supplementary material
Source: PubMed Central journal article supplement (PMC3567700)
Supplement: Supp_Fig2.pdf [file Supp_Fig2.pdf]

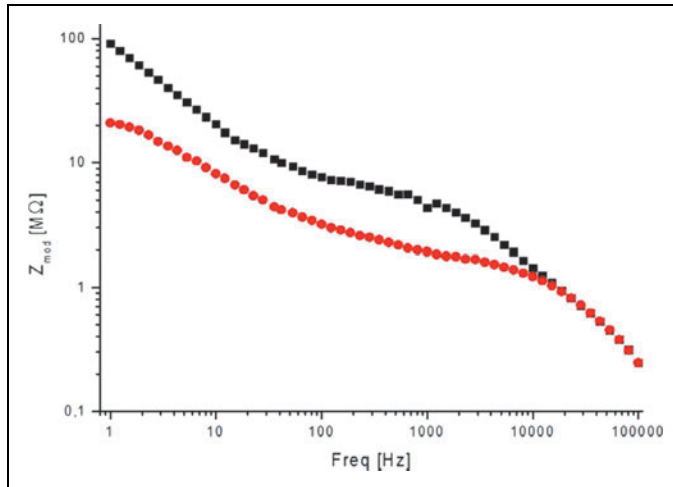

**Supplementary Fig. S2.** Typical impedance spectroscopic measurement of a single-spike microelectrode before (squares) and after (circle) chlorination. The modulus  $Z_{mod}$  measured at frequencies  $<10,000$  Hz dropped down after chlorination protocol, showing a successful chlorination of the tip.
